# Supplementary material for: Nitric oxide-driven modifications of lipoic arm inhibit α-ketoacid dehydrogenases
Source: PubMed Central journal article supplement (PMC9974485; doi:10.1038/s41589-022-01153-w), 2022-10-20

**Figure 5d**

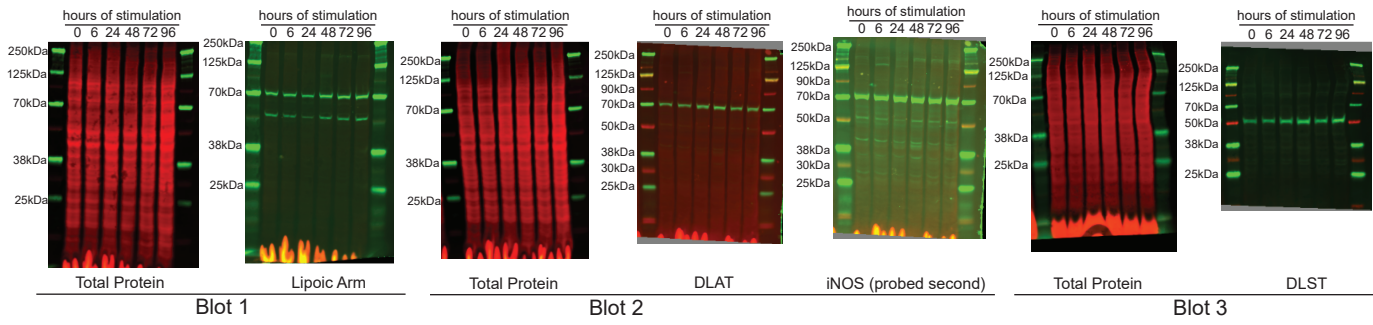

**Figure 5g**

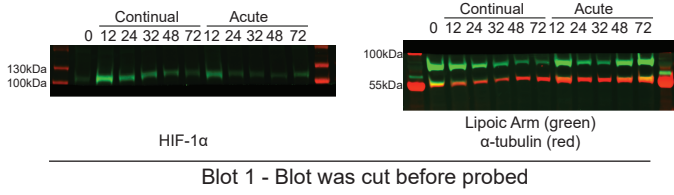

Supplement: 41589_2022_1153_MOESM11_ESM.pdf [file 41589_2022_1153_MOESM11_ESM.pdf]
